# Supplementary material for: Novel TMEM173 Mutation and the Role of Disease Modifying Alleles
Source: PubMed Central journal article supplement (PMC6907089; doi:10.3389/fimmu.2019.02770), 2019-12-05
Supplement: Table_1.pdf [file Table_1.pdf]

## SUPPLEMENTARY TABLE I

### A

| Mutagenesis primers (F, forward primer; R, reverse primer) |                                        |  |
|------------------------------------------------------------|----------------------------------------|--|
| Primer                                                     | Sequence 5' -> 3'                      |  |
| TMEM173_N154S_F                                            | GGAATTTTCAGCGTGGCCCATGGGCTGGCAG        |  |
| TMEM173_N154S_R                                            | ATGGGCCACGCTGAAATTCCCTTTTTCACACACTGCAG |  |
| TMEM173_I200N_F                                            | CGGCTGTATAATCTCCTCCCATTGGACTGTG        |  |
| TMEM173_I200N_R                                            | TGGGAGGAGATTATACAGCCGCTGGCTCACT        |  |
| TMEM173_G207E_F                                            | TTGGACTGTGAGGTGCCTGATAACCTGAGTATGGC    |  |
| TMEM173_G207E_R                                            | ATCAGGCACCTCACAGTCCAATGGGAGGAGTTATATG  |  |
| TMEM173_H232R-F                                            | CAGCAGACCGGTGACCGTGCTGGCATCAAGGATCGGG  |  |
| TMEM173_H232R-R                                            | GATGCCAGCACGGTCACCGGTCTGCTGGGGCAGTTT   |  |

  

| Quantitative real-time PCR primers (F, forward primer ; R, reverse primer) |                          |                                                                  |
|----------------------------------------------------------------------------|--------------------------|------------------------------------------------------------------|
| Primer                                                                     | Sequence 5' -> 3'        | Gene                                                             |
| ASC_F                                                                      | TTGGACCTCACCGACAAGC      | apoptosis-associated speck like protein containing a CARD domain |
| ASC_R                                                                      | ATGTGCGCAGCACGTTA        |                                                                  |
| B2M_F                                                                      | GAGTATGCCTGCCGTGTGAA     | beta-2 microglobulin (housekeeping)                              |
| B2M_R                                                                      | TGCGGCATCTTCAAACCTCC     |                                                                  |
| CASP1_F                                                                    | ATCCCACAATGGGCTCTGTTT    | caspase-1                                                        |
| CASP1_R                                                                    | CTCTTTCAGTGGTGGGCATCT    |                                                                  |
| IFIT2_F                                                                    | GCCGAACAGCTGAGAATTGC     | interferon induced protein with tetratricopeptide repeats 2      |
| IFIT2_R                                                                    | AGGCCAGTAGGTTGCACATTG    |                                                                  |
| IFNB1_F                                                                    | GAGCTACAACCTTGCTTGGATTCC | interferon beta 1                                                |
| IFNB1_R                                                                    | CAAGCCTCCCATTCAATTGC     |                                                                  |
| IL1B_F                                                                     | TGGCAATGAGGATGACTTGT     | interleukin-1 beta                                               |
| IL1B_R                                                                     | GGAAAGAAGGTGCTCAGGTC     |                                                                  |
| IL18_F                                                                     | TCAACTCTCTCCTGTGAGAACAAA | interleukin-18                                                   |
| IL18_R                                                                     | GTCCTGGGACACTTCTCTGAAA   |                                                                  |
| MX1_F                                                                      | CGAGATGTCCCGGATCTGACT    | MX dynamin like GTPase 1                                         |
| MX1_R                                                                      | CACCACCAGGCTGATTGTCT     |                                                                  |
| NLRP3_F                                                                    | CAACTGCAACCTCACGTCAC     | NLR family pyrin domain containing 3                             |
| NLRP3_R                                                                    | ACGGTCAGCTCAGGCTTTTC     |                                                                  |
| RPLP0_F                                                                    | GAAATCCTGAGTGATGTGCAGC   | ribosomal protein lateral stalk subunit P0 (housekeeping)        |
| RPLP0_R                                                                    | TCGAACACCTGCTGGATGAC     |                                                                  |
| TNF_F                                                                      | TGCTGCACTTTGGAGTGATCG    | tumor necrosis factor alpha                                      |
| TNF_R                                                                      | ATCTCTCAGCTCCACGCCATT    |                                                                  |

### B

| SDM predictions on STING protein stability with C206Y and G207E patient mutations |          |             |            |              |        |             |               |         |                                   |                   |
|-----------------------------------------------------------------------------------|----------|-------------|------------|--------------|--------|-------------|---------------|---------|-----------------------------------|-------------------|
| Mutation                                                                          | PDB File | Residue 232 | WT-RSA (%) | WT-DEPTH (Å) | WT-OSP | MUT-RSA (%) | MUT-DEPTH (Å) | MUT-OSP | Predicted pseudo $\Delta\Delta G$ | Outcome           |
| <b>C206Y</b>                                                                      | 4LOI     | H           | 0.0        | 7.4          | 0.56   | 0.0         | 8.0           | 0.7     | -1,27                             | Reduced stability |
| <b>G207E</b>                                                                      | 4LOI     | H           | 57.1       | 4.4          | 0.35   | 49.8        | 3.5           | 0.27    | -0,72                             | Reduced stability |
| <b>C206Y</b>                                                                      | 4KSY     | R           | 0.0        | 6.7          | 0.53   | 0.1         | 7.0           | 0.64    | -1,28                             | Reduced stability |
| <b>G207E</b>                                                                      | 4KSY     | R           | 82.5       | 3.9          | 0.32   | 73.6        | 3.3           | 0.23    | -0,63                             | Reduced stability |

Percentage relative sidechain solvent accessibility (RSA) for wildtype (WT) and both mutant (MUT) residues at 206 and 207. Residue depth is presented for WT and MUT residues in angstrom units (Å). Residue occluded surface packing (OSP) is likewise presented for WT and MUT. Predicted pseudo  $\Delta\Delta G$  and its effect on protein stability (outcome) are presented.
