# Supplementary material for: Novel TMEM173 Mutation and the Role of Disease Modifying Alleles
Source: PubMed Central journal article supplement (PMC6907089; doi:10.3389/fimmu.2019.02770), 2019-12-05
Supplement: Table_2.pdf [file Table_2.pdf]

## SUPPLEMENTARY TABLE II

### A Blood counts, autoantibodies and functional assay findings in STING G207E carriers.

| Patient                                                                             | Control Range                                                              | IV.1    | V.2     | III.4   | III.7   | III.9   | IV.6    |
|-------------------------------------------------------------------------------------|----------------------------------------------------------------------------|---------|---------|---------|---------|---------|---------|
| Leukocytes (10 <sup>6</sup> /l)                                                     | 3400-8200                                                                  | 4400    | 5100    | 4500    | 5900    | 5600    | 4200    |
| Lymphocytes (10 <sup>6</sup> /l)                                                    | 1300-3600                                                                  | 2240    | 1880    | 1600    | 2180    | 1860    | 1270    |
| Monocytes (10 <sup>6</sup> /l)                                                      | 200-800                                                                    | 190     | 110     | 540     | 500     | 220     | 100     |
| Neutrophils (10 <sup>6</sup> /l)                                                    | 1500-6700                                                                  | 1820    | 2840    | 2190    | 3040    | 3200    | 2580    |
| Basophils (10 <sup>6</sup> /l)                                                      | 0-100                                                                      | 20      | 10      | 10      | 10      | 10      | 0       |
| Eosinophils (10 <sup>6</sup> /l)                                                    | 30-440                                                                     | 120     | 270     | 180     | 120     | 300     | 100     |
| B cells (CD19+) (10 <sup>6</sup> /l)                                                | 100-500                                                                    | 70      | 340     | 180     | 180     | 290     | 50      |
| CD3+CD4+ (10 <sup>6</sup> /l)                                                       | 300-1400                                                                   | 802     | 929     | 869     | 1065    | 1030    | 712     |
| CD3+CD8+ (10 <sup>6</sup> /l)                                                       | 200-1200                                                                   | 290     | 310     | 250     | 600     | 430     | 210     |
| NK cells (CD3 <sup>-</sup> CD16 <sup>+</sup> 56 <sup>+</sup> ) (10 <sup>6</sup> /l) | 90-600                                                                     | 50      | 180     | 180     | 280     | 120     | 200     |
| Platelets (10 <sup>6</sup> /l)                                                      | 150 000-360 000                                                            | 107 000 | 254 000 | 229 000 | 279 000 | 274 000 | 173 000 |
| ANA-ab (titer)                                                                      | <320                                                                       | <80     | <80     | <80     | <80     | <80     | <80     |
| ENA-ab                                                                              | Negat                                                                      | Negat   | Negat   | Negat   | Negat   | Negat   | Negat   |
| DNA-ab (IU/ml)                                                                      | <10                                                                        | <10     | <10     | NA      | <10     | <10     | <10     |
| ANCA                                                                                | Negat                                                                      | Negat   | Negat   | Negat   | NA      | Negat   | NA      |
| LupusAK                                                                             | Negat                                                                      | Negat   | Negat   | NA      | Negat   | Negat   | NA      |
| PLAb                                                                                | Negat                                                                      | Negat   | NA      | NA      | Negat   | NA      | NA      |
| KardAbG (U/ml)                                                                      | <15                                                                        | <4      | <4      | NA      | <4      | 4       | NA      |
| IgE (kU/l)                                                                          | 0-110                                                                      | 290     | 4418    | 738     | 889     | 46      | 889     |
| <b>Complement</b>                                                                   | Classical, alternative, mannan-binding lectin pathway hemolytic activities | Normal  | Normal  | Normal  | Normal  | Normal  | Normal  |
| <b>Lymphocyte proliferative responses to mitogens</b>                               | Phytohemagglutinin, concanavalin A, pokeweed mitogen                       | Normal  | Normal  | NA      | NA      | Normal  | NA      |

### B Hematologic parameters of T- and B-cells of affected family members.

| Patient                 | Control Range (%)                                        | IV.1        | V.2         | III.4       | III.7       | III.9       | IV.6        |
|-------------------------|----------------------------------------------------------|-------------|-------------|-------------|-------------|-------------|-------------|
| CD4-CD8-TCRab+          | 0,3-3,3                                                  | 0.6         | 3.1         | 0.2         | 0.7         | 0.1         | 0.3         |
| TCRgd+                  | 1,9-11,7                                                 | 0.4         | 2.8         | 2.5         | 3.0         | 1.1         | 2.0         |
| <b>CD3+CD4+ T cells</b> | <b>35.6–56.0</b>                                         | <b>73.6</b> | <b>72.6</b> | <b>77.6</b> | <b>63</b>   | <b>73.9</b> | <b>74.9</b> |
| Naïve                   | CCR7 <sup>+</sup> CD45RA <sup>+</sup>                    | 62.8        | 69.3        | 71.3        | 59.9        | 61.3        | 76.1        |
| TCM                     | CCR7 <sup>+</sup> CD45RA <sup>-</sup>                    | 30.2        | 19.6        | 20.9        | 27.8        | 24.8        | 14.6        |
| TEM                     | CCR7 <sup>-</sup> CD45RA <sup>-</sup>                    | 6.3         | 7.9         | 6.7         | 11.3        | 11.3        | 8.5         |
| TEMRA                   | CCR7 <sup>-</sup> CD45RA <sup>+</sup>                    | 0.7         | 1.7         | 1.0         | 1.0         | 2.6         | 0.8         |
| Activated               | HLADR <sup>+</sup> CD38 <sup>-</sup>                     | 4.5         | 4.3         | 8.4         | 7.4         | 7.0         | 3.6         |
|                         | HLADR <sup>-</sup> CD38 <sup>+</sup>                     | 62.8        | 74.7        | 70.3        | 50.7        | 53.5        | 77.0        |
|                         | HLADR <sup>+</sup> CD38 <sup>+</sup>                     | 3.3         | 3.9         | 5.0         | 3.9         | 2.0         | 1.9         |
| RTE                     | CD45RA <sup>+</sup> CD62L <sup>+</sup> CD31 <sup>+</sup> | 28.8        | 43.2        | 28.6        | 16.7        | 19.0        | 24.5        |
| Treg                    | CD25 <sup>hi</sup> CD127 <sup>lo</sup>                   | 9.8         | 8.6         | 6.6         | 7.3         | 5.8         | 6.5         |
| <b>CD3+CD8+ T-cells</b> | <b>13.1–34.5</b>                                         | <b>26.6</b> | <b>24.2</b> | <b>22.3</b> | <b>35.7</b> | <b>30.9</b> | <b>22.1</b> |
| Naive                   | CCR7 <sup>+</sup> CD45RA <sup>+</sup>                    | 45.3        | 68.9        | 32.6        | 23.0        | 27.8        | 53.6        |
| TCM                     | CCR7 <sup>+</sup> CD45RA <sup>-</sup>                    | 22.8        | 4.9         | 7.1         | 14.7        | 15.1        | 6.6         |
| TEM                     | CCR7 <sup>-</sup> CD45RA <sup>-</sup>                    | 7.8         | 5.9         | 12.7        | 16.8        | 10.1        | 16.2        |
| Temra                   | CCR7 <sup>-</sup> CD45RA <sup>+</sup>                    | 24.1        | 20.3        | 47.5        | 45.5        | 47.0        | 23.6        |
| Activated               | HLADR <sup>+</sup> CD38 <sup>-</sup>                     | 13.7        | 14.9        | 33.2        | 23.8        | 22.4        | 5.0         |
|                         | HLADR <sup>-</sup> CD38 <sup>+</sup>                     | 19.3        | 50.1        | 15.1        | 15.1        | 11.6        | 39.1        |
|                         | HLADR <sup>+</sup> CD38 <sup>+</sup>                     | 12.0        | 12.8        | 24.5        | 14.0        | 13.5        | 6.3         |
|                         |                                                          | 290         | 4418        | 738         | 889         | 46          | 889         |
| <b>CD19+ B- cells</b>   | <b>5-22</b>                                              | <b>3</b>    | <b>15</b>   | <b>9</b>    | <b>9</b>    | <b>15</b>   | <b>3</b>    |
| Naïve                   | CD27 <sup>+</sup> IgD <sup>+</sup>                       | 31.6        | 89.9        | 86          | 91.6        | 86.2        | 60.6        |
| Activated               | CD38 <sup>low</sup> CD21 <sup>low</sup>                  | 12.4        | 6           | 7.5         | 2.8         | 1.5         | 9.1         |

Negat= negative, NA = not available. Values higher than control range are highlighted with red, whereas lower values are indicated with blue background.
